# Supplementary material for: Characterization of the L-Arginine/Nitric Oxide Pathway and Oxidative Stress in Pediatric Patients with Atopic Diseases
Source: MDPI journal article supplement (doi:10.3390/ijms23042136), 2022-02-15
Supplement: s1 [file s1]

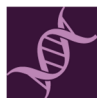

Article

# Characterization of the L-Arginine/Nitric Oxide Pathway and Oxidative Stress in Pediatric Patients with Atopic Diseases

Beatrice Hanusch <sup>1</sup>, Kathrin Sinnigen <sup>1</sup>, Folke Brinkmann <sup>1</sup>, Stefanie Dillenhöfer <sup>1</sup>, Mirjam Frank <sup>2</sup>, Karl-Heinz Jöckel <sup>2</sup>, Cordula Koerner-Rettberg <sup>3</sup>, Martin Holtmann <sup>4</sup>, Tanja Legenbauer <sup>4</sup>, Christian Langrock <sup>5</sup>, Thomas Reinehr <sup>5</sup>, Patricia Maasjosthusmann <sup>6</sup>, Bibiana Beckmann <sup>7</sup>, Eckard Hamelmann <sup>6,†</sup>, Dimitrios Tsikas <sup>7,†</sup> and Thomas Lücke <sup>1,\*,†</sup>

- <sup>1</sup> University Hospital of Pediatrics and Adolescent Medicine, St. Josef-Hospital, Ruhr-University Bochum, 44791 Bochum, Germany; beatrice.hanusch@rub.de (B.H.); kathrin.sinnigen@rub.de (K.S.); folke.brinkmann@rub.de (F.B.); stefanie.dillenhoef@klinikum-bochum.de (S.D.)
  - <sup>2</sup> Institute for Medical Informatics, Biometry and Epidemiology, University of Duisburg-Essen, 45122 Essen, Germany; mirjam.frank@uk-essen.de (M.F.); k-h.joeckel@uk-essen.de (K.-H.J.)
  - <sup>3</sup> Clinic for Children and Youth Medicine, Marien-Hospital, 46483 Wesel, Germany; cordula.koerner-rettberg@prohomed.de
  - <sup>4</sup> LWL University Hospital for Child and Adolescent Psychiatry, Ruhr University Bochum, 44791 Bochum, Germany; martin.holtmann@lwl.org (M.H.); tanja.legenbauer@rub.de (T.L.)
  - <sup>5</sup> Department of Pediatric Endocrinology, Diabetes and Nutrition Medicine, Vestische Kinder- und Jugendklinik Datteln, University of Witten/Herdecke, 45711 Datteln, Germany; info@psychotherapie-langrock.de (C.L.); t.reinehr@kinderklinik-datteln.de (T.R.)
  - <sup>6</sup> University Children's Center Bethel, Protestant Hospital Bethel, University Bielefeld, 33617 Bielefeld, Germany; patricia.maasjosthusmann@evkb.de (P.M.); eckard.hamelmann@evkb.de (E.H.)
  - <sup>7</sup> Institute of Toxicology, Core Unit Proteomics, Hannover Medical School, 30623 Hannover, Germany; beckmann.bibiana@mh-hannover.de (B.B.); tsikas.dimitros@mh-hannover.de (D.T.)
- \* Correspondence: thomas.luecke@ruhr-uni-bochum.de; Tel.: +49-234-509-2611  
† Shared senior authors.

**Citation:** Hanusch, B.; Sinnigen, K.; Brinkmann, F.; Dillenhöfer, S.; Frank, M.; Jöckel, K.-H.; Koerner-Rettberg, C.; Holtmann, M.; Legenbauer, T.; Langrock, C.; et al. Characterization of the L-Arginine/Nitric Oxide Pathway and Oxidative Stress in Pediatric Patients with Atopic Diseases. *Int. J. Mol. Sci.* **2022**, *23*, 2136. <https://doi.org/10.3390/ijms23042136>

**Keywords:** Atopic diseases; nitric oxide; attention deficit/hyperactivity syndrome; bronchial asthma; atopic dermatitis; common pediatric diseases

Academic Editors: Madhav Bhatia and Isao Ishii

Received: 21 January 2022

Accepted: 9 February 2022

Published: 15 February 2022

**Publisher's Note:** MDPI stays neutral with regard to jurisdictional claims in published maps and institutional affiliations.

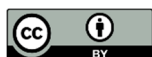

**Copyright:** © 2022 by the authors. Licensee MDPI, Basel, Switzerland. This article is an open access article distributed under the terms and conditions of the Creative Commons Attribution (CC BY) license (<https://creativecommons.org/licenses/by/4.0/>).

**Table S1** Comparison between pediatric patients only affected by BA, AD or by a combination of BA and AD

|                            | BA                       | AD                       | BA + AD                  | P Value |
|----------------------------|--------------------------|--------------------------|--------------------------|---------|
| Number of subjects (n)     | 41                       | 7                        | 47                       | -       |
| <b>Plasma</b>              |                          |                          |                          |         |
| Arg (P) (μM)               | 84.07 (71.15 – 99.10)    | 77.75 (73.73 – 113.71)   | 81.74 (66.96 – 91.46)    | 0.586   |
| hArg P (μM)                | 1.14 ± 0.49              | 1.28 ± 0.54              | 1.11 ± 0.29              | 0.583   |
| ADMA (P) (μM)              | 0.67 (0.55 – 0.84)       | 0.77 (0.55 – 0.88)       | 0.69 (0.60 – 0.79)       | 0.626   |
| Arg/ADMA ratio (P)         | 125.97 (92.89 – 150.11)  | 111.58 (104.23 – 136.27) | 109.98 (89.25 – 138.93)  | 0.415   |
| hArg/ADMA                  | 1.62 ± 0.68              | 1.79 ± 1.00              | 1.59 ± 0.52              | 0.728   |
| Nitrate (P) (μM)           | 93.24 (83.91 – 108.05)   | 84.44 (76.17 – 112.98)   | 89.07 (78.70 – 110.85)   | 0.641   |
| Nitrite (P) (μM)           | 3.79 (3.57 – 4.41)       | 4.56 (3.70 – 5.19)       | 3.96 (3.64 – 4.51)       | 0.276   |
| P <sub>NOxR</sub>          | 23.41 (20.85 – 27.60)    | 19.41 (16.72 – 23.55)    | 21.58 (19.73 – 26.55)    | 0.216   |
| <b>Urine</b>               |                          |                          |                          |         |
| ADMA (μM/mM creatinine)    | 6.27 ± 4.13              | 6.51 ± 3.76              | 6.28 ± 3.84              | 0.989   |
| DMA (μM/mM creatinine)     | 38.68 (35.66 – 42.91)    | 41.97 (34.63 – 55.69)    | 37.35 (34.33 – 42.93)    | 0.317   |
| DMA + ADMA                 | 45.52 (41.41 – 49.09)    | 44.27 (42.94 – 66.20)    | 44.81 (39.12 – 48.35)    | 0.664   |
| DMA/ADMA                   | 5.60 (4.36 – 12.96)      | 6.48 (4.40 – 13.62)      | 5.13 (4.46 – 16.19)      | 0.794   |
| SDMA (μM/mM creatinine)    | 6.8 (5.44 – 8.48)        | 9.00 (5.51 – 10.72)      | 6.67 (5.24 – 8.55)       | 0.660   |
| DMA + ADMA + SDMA          | 53.04 (48.23 – 56.31)    | 54.39 (48.45 – 75.20)    | 51.67 (45.97 – 57.68)    | 0.559   |
| (DMA + ADMA)/SDMA          | 6.43 (5.05 – 8.21)       | 6.96 (4.26 – 7.79)       | 6.67 (5.34 – 8.72)       | 0.845   |
| Nitrate (μM/mM creatinine) | 106.06 (90.01 – 114.07)  | 136.41 (88.36 – 198.84)  | 96.66 (78.52 – 128.86)   | 0.132   |
| Nitrite (μM/mM creatinine) | 0.35 (0.28 – 0.71)       | 0.59 (0.24 – 1.03)       | 0.38 (0.19 – 0.76)       | 0.809   |
| U <sub>NOxR</sub>          | 259.20 (143.32 – 383.91) | 216.36 (162.39 – 350.80) | 287.57 (149.48 – 418.02) | 0.888   |

Abbreviations: AD, atopic dermatitis; ADHD, Attention Deficit/Hyperactivity Disorder; ADMA, asymmetric dimethylarginine; Arg, L-arginine; BA, bronchial asthma; DMA, dimethylamine; hArg, homoarginine; P, Plasma; P<sub>NOxR</sub>, nitrate/nitrite ratio in plasma; SDMA, symmetric dimethylarginine; U, urine; U<sub>NOxR</sub>, nitrate/nitrite ratio in urine. Data are presented as mean ± standard deviation (SD, normally distributed data) or median (25-75th interquartile range, non-normally distributed data).

**Table S2** Comparison of NO metabolite concentration between pediatric patients with well-controlled asthma bronchiale (BA) and such with not-well controlled BA, classified according to the asthma control test [71,72]

|                               | BA well controlled       | BA not-well controlled    | P Value |
|-------------------------------|--------------------------|---------------------------|---------|
| Number of subjects (n)        | 72                       | 20                        | -       |
| Asthma control test scores    | 24 (22 – 26)             | 17 (15 – 18)              | -       |
| <b>Plasma</b>                 |                          |                           |         |
| Arg (μM)                      | 81.11 (67.81 – 92.71)    | 84.94 (69.54 – 99.32)     | 0.589   |
| hArg (μM)                     | 1.14 ± 0.43              | 1.12 ± 0.33               | 0.758   |
| ADMA (μM)                     | 0.68 (0.59 – 0.82)       | 0.65 (0.55 – 0.78)        | 0.460   |
| Arg/ADMA ratio                | 118.76 (93.59 – 141.17)  | 120.31 (104.03 – 145.88)  | 0.389   |
| hArg/ADMA ratio               | 1.63 ± 0.66              | 1.69 ± 0.55               | 0.729   |
| Nitrate (μM)                  | 87.50 (79.05 – 108.26)   | 92.42 (84.37 – 112.04)    | 0.248   |
| Nitrite (μM)                  | 3.81 (3.57 – 4.44)       | 4.13 (3.85 – 4.58)        | 0.074   |
| P <sub>NOxR</sub>             | 22.65 (19.75 – 26.57)    | 21.35 (19.85 – 27.48)     | 0.748   |
| MDA (μM)                      | 0.39 (0.35 – 0.43)       | 0.47 (0.36 – 0.67)        | 0.478   |
| <b>Urine</b>                  |                          |                           |         |
| ADMA<br>(μM/mM creatinine)    | 6.53 ± 3.94              | 5.67 ± 3.90               | 0.389   |
| DMA<br>(μM/mM creatinine)     | 38.22 (35.11 – 42.85)    | 36.74 (34.32 – 43.02)     | 0.466   |
| DMA + ADMA                    | 45.30 (41.13 – 49.02)    | 43.44 (39.92 – 49.05)     | 0.478   |
| DMA/ADMA                      | 5.30 (4.40 – 10.68)      | 5.68 (4.35 – 17.62)       | 0.694   |
| SDMA                          | 6.68 (5.47 – 8.84)       | 6.91 (5.18 – 8.91)        | 0.962   |
| DMA + ADMA + SDMA             | 51.92 (47.70 – 56.61)    | 53.34 (46.53 – 57.71)     | 0.908   |
| (DMA + ADMA)/SDMA             | 6.52 (5.17 – 7.87)       | 6.59 (4.83 – 8.76)        | 0.916   |
| Nitrate<br>(μM/mM creatinine) | 106.31 (84.71 – 127.87)  | 95.37 (86.45 – 129.45)    | 0.762   |
| Nitrite<br>(μM/mM creatinine) | 0.38 (0.26 – 0.68)       | 0.50 (0.26 – 1.00)        | 0.421   |
| U <sub>NOxR</sub>             | 281.99 (163.43 – 374.09) | 247.07 (110.50 – 410.19)  | 0.570   |
| MDA (μM /mM creatinine)       | 0.28 (0.20 – 0.46)       | 0.25 (0.18 – 0.55)        | 0.887   |
| <b>Inflammation</b>           |                          |                           |         |
| IGA                           | 136.23 ± 53.25           | 153.30 ± 47.81            | 0.199   |
| IGE                           | 395.00 (105.00 – 863.00) | 793.00 (242.00 – 1137.25) | 0.084   |
| IGG                           | 1018.73 ± 193.25         | 1095.45 ± 194.01          | 0.121   |
| IGM                           | 84.00 (65.00 – 115.00)   | 92.50 (52.50 – 122.00)    | 0.893   |
| IL6                           | 1.80 (1.20 – 2.45)       | 1.60 (1.40 – 2.40)        | 0.634   |

Abbreviations: AD, atopic dermatitis; ADMA, asymmetric dimethylarginine; Arg, L-arginine; BA, bronchial asthma; DMA, dimethylamine; hArg, homoarginine; P, Plasma; P<sub>NOxR</sub>, nitrate/nitrite ratio in plasma; SDMA, symmetric dimethylarginine; U, urine; U<sub>NOxR</sub>, nitrate/nitrite ratio in urine. Data are presented as mean ± standard deviation (SD, normally distributed data) or median (25–75th interquartile range, non-normally distributed data).

**Table S3** Comparison of concentrations of NO metabolites in patients affected by light to moderate atopic dermatitis (AD) and severe AD classified according to SCORAD

|                                 | Moderate AD              | Severe AD                | P Value  |
|---------------------------------|--------------------------|--------------------------|----------|
| Number of subjects ( <i>n</i> ) | 36                       | 9                        | -        |
| <b>Plasma</b>                   |                          |                          |          |
| Arg (μM)                        | 83.65 ± 22.34            | 87.5 ± 16.06             | 0.631    |
| hArg (μM)                       | 1.15 ± 0.34              | 1.1 ± 0.39               | 0.721    |
| ADMA (μM)                       | 0.69 (0.6 - 0.81)        | 0.68 (0.58 - 0.74)       | 0.770*   |
| Arg/ADMA ratio                  | 117.27 ± 34.68           | 131.79 ± 27.69           | 0.251    |
| hArg/ADMA ratio                 | 1.62 ± 0.55              | 1.71 ± 0.78              | 0.681    |
| Nitrate (μM)                    | 93.01 ± 19.79            | 90.63 ± 16.59            | 0.742    |
| Nitrite (μM)                    | 4.07 ± 0.58              | 4.19 ± 1.06              | 0.621    |
| P <sub>NOxR</sub>               | 21.03 (19.03 - 26.48)    | 21.76 (19.13 - 26.77)    | 0.856*   |
| MDA (μM)                        | 0.38 (0.36 - 0.43)       | 0.37 (0.33 - 0.59)       | 0.989    |
| <b>Urine</b>                    |                          |                          |          |
| ADMA<br>(μM/mM creatinine)      | 6.58 (3 - 8.66)          | 6.79 (3.47 - 8.67)       | 0.727*   |
| DMA<br>(μM/mM creatinine)       | 37.36 (34.5 - 42.85)     | 37.85 (31.82 - 41.86)    | 0.753*   |
| DMA + ADMA                      | 44.27 (40.38 - 47.66)    | 42.03 (37.38 - 48.54)    | 0.710*   |
| DMA/ADMA                        | 5.3 (4.73 - 13.62)       | 4.52 (4.38 - 12.56)      | 0.439*   |
| SDMA                            | 6.88 (5.3 - 8.98)        | 5.32 (2.96 - 9.37)       | 0.211*   |
| DMA + ADMA + SDMA               | 50.62 (46.54 - 56.19)    | 47.7 (40.51 - 57.91)     | 0.358*   |
| (DMA + ADMA)/SDMA               | 6.72 (5.17 - 7.66)       | 8.77 (5.39 - 14.08)      | 0.165*   |
| Nitrate<br>(μM/mM creatinine)   | 113.67 (78.38 - 134.5)   | 94.55 (71.22 - 190.46)   | > 0.999* |
| Nitrite<br>(μM/mM creatinine)   | 0.38 (0.19 - 0.65)       | 0.37 (0.26 - 1.05)       | 0.791*   |
| U <sub>NOxR</sub>               | 302.47 (159.3 - 421.9)   | 265.94 (199.38 - 351.87) | 0.856*   |
| MDA (μM /mM creatinine)         | 0.28 (0.19 - 0.46)       | 0.24 (0.12 - 0.35)       | 0.181    |
| <b>Inflammation</b>             |                          |                          |          |
| IGA                             | 154.19 ± 51.96           | 128.22 ± 26.36           | 0.156    |
| IGE                             | 304.00 (135.75 - 900.25) | 581 (341 - 2534.5)       | 0.131*   |
| IGG                             | 1081.08 ± 186.82         | 1062.56 ± 153.29         | 0.785    |
| IGM                             | 104.47 ± 49.8            | 88.44 ± 27.35            | 0.360    |
| IL6                             | 2.00 (1.18 - 2.58)       | 1.9 (1.45 - 3.05)        | 0.758*   |

Abbreviations: AD, atopic dermatitis; ADMA, asymmetric dimethylarginine; Arg, L-arginine; BA, bronchial asthma; DMA, dimethylamine; hArg, homoarginine; P, Plasma; P<sub>NOxR</sub>, nitrate/nitrite ratio in plasma; SDMA, symmetric dimethylarginine; U, urine; U<sub>NOxR</sub>, nitrate/nitrite ratio in urine, \*exact significance. Data are presented as mean ± standard deviation (SD, normally distributed data) or median (25-75th interquartile range, non-normally distributed data).

**Table S4** Spearman correlation of immunoglobulin E (IgE) concentration in plasma and nitrate and nitrite in plasma and urine

| <b>IgE vs.</b>                                   | <b>Correlation coefficient r</b> | <b>P value</b> |
|--------------------------------------------------|----------------------------------|----------------|
|                                                  | Plasma                           |                |
| Nitrate ( $\mu\text{M}$ )                        | 0.065                            | 0.501          |
| Nitrite ( $\mu\text{M}$ )                        | 0.147                            | 0.139          |
|                                                  | Urine                            |                |
| Nitrate<br>( $\mu\text{M}/\text{mM}$ creatinine) | 0.008                            | 0.938          |
| Nitrite<br>( $\mu\text{M}/\text{mM}$ creatinine) | <0.001                           | 0.998          |
